# Supplementary material for: Heightened effort discounting is a common feature of both apathy and fatigue
Source: PubMed Central journal article supplement (PMC8593117; doi:10.1038/s41598-021-01287-2), 2021-11-15
Supplement: 41598_2021_1287_MOESM1_ESM.pdf [file 41598_2021_1287_MOESM1_ESM.pdf]

# Heightened effort discounting is a common feature of both apathy and fatigue

## Supplementary Information

Mindaugas Jurgelis <sup>1,2\*</sup>, Wei Binh Chong <sup>1,2</sup>, Kelly J. Atkins <sup>1,2</sup>, Patrick S. Cooper <sup>1,2</sup>, James P. Coxon <sup>1,2</sup>, & Trevor T-J Chong <sup>1,2,3,4\*</sup>

<sup>1</sup> Turner Institute for Brain and Mental Health, Monash University, Victoria 3800, Australia

<sup>2</sup> School of Psychological Sciences, Monash University, Victoria 3800, Australia

<sup>3</sup> Department of Neurology, Alfred Health, Melbourne, Victoria 3004, Australia

<sup>4</sup> Department of Clinical Neurosciences, St Vincent's Hospital, Melbourne, Victoria 3065, Australia

## Internal consistency analyses

We performed a reliability analysis on the internal consistency of each of the Dimensional Apathy Scale, Multidimensional Fatigue Inventory, and Modified Fatigue Impact Scale using Cronbach's  $\alpha$ . Overall, our estimates of internal consistency were in keeping with previous reports.

**Dimensional Apathy Scale.** Our measures of internal consistency were similar to those reported in previous studies (*Table S1*). The full scale showed acceptable internal consistency ( $\alpha = 0.79$ , reported range 0.76 – 0.87 in previous studies<sup>33,38-41</sup>), as did the Executive subscale ( $\alpha = 0.86$ , reported range 0.78 – 0.86<sup>38,40,41</sup>). In our study, the internal consistency of the Action Initiation scale fell slightly below the 0.7 threshold conventionally held to be acceptable ( $\alpha = 0.68$ , reported range 0.76 – 0.86<sup>38,40,41</sup>). The internal consistency of the Emotional subscale was low, in keeping with previous studies ( $\alpha = 0.43$ , reported range 0.47 – 0.56<sup>38,40,41</sup>).

**Multidimensional Fatigue Inventory.** Our estimates of internal consistency were similar to those reported in previous studies (*Table S1*). The internal consistency for the full scale was excellent ( $\alpha = 0.92$ ; reported range 0.84 – 0.92<sup>43-45</sup>). The General Fatigue, Physical Fatigue, Mental Fatigue, and Reduced Activity subscales all showed acceptable-to-excellent levels of internal consistency (General  $\alpha = 0.92$ , reported range 0.69–90<sup>9,43,45</sup>; Physical  $\alpha = 0.72$ , reported range 0.74 – 0.93<sup>9,43,45</sup>; Mental  $\alpha = 0.84$ , reported range 0.82 – 0.93<sup>9,43,45</sup>; Reduced Activity  $\alpha = 0.78$ , reported range 0.53 – 0.93<sup>9,43,45</sup>). The Reduced Motivation subscale had lower levels of internal consistency, which is also consistent with previous reports ( $\alpha = 0.65$ , reported range 0.50 – 0.94<sup>9,43,45</sup>).

**Modified Fatigue Impact Scale.** Our reliability analysis revealed excellent internal consistency for the full scale ( $\alpha = 0.96$ , reported range 0.94 – 0.97<sup>46-50</sup>). The internal consistency of the Physical Fatigue and Cognitive Fatigue scales were similarly excellent (Physical Fatigue  $\alpha = 0.92$ , reported range 0.84 – 0.96<sup>46,47,50,51</sup>; Cognitive Fatigue  $\alpha = 0.93$ , reported range 0.91 - 0.95<sup>46-48,50,51</sup>). The two-item Psychosocial subscale showed lower internal consistency than the other two subscales ( $\alpha = 0.65$ , previously reported internal consistency 0.80<sup>51</sup>).

**Table S1.** Internal consistency measures (Cronbach's  $\alpha$ ) of the Dimensional Apathy Scale, Multidimensional Fatigue Inventory, and Modified Fatigue Impact Scale, as derived from data in the present study.

|                                           | <b>Cronbach's <math>\alpha</math></b> |
|-------------------------------------------|---------------------------------------|
| <b>Dimensional Apathy Scale</b>           | 0.79                                  |
| Executive                                 | 0.86                                  |
| Emotional                                 | 0.43                                  |
| Action Initiation                         | 0.68                                  |
|                                           |                                       |
| <b>Multidimensional Fatigue Inventory</b> | 0.92                                  |
| General                                   | 0.83                                  |
| Physical                                  | 0.72                                  |
| Mental                                    | 0.84                                  |
| Reduced Activity                          | 0.78                                  |
| Reduced Motivation                        | 0.65                                  |
|                                           |                                       |
| <b>Modified Fatigue Impact Scale</b>      | 0.96                                  |
| Physical                                  | 0.92                                  |
| Cognitive                                 | 0.93                                  |
| Psychosocial                              | 0.65                                  |

## Control analyses excluded an effect of performance on effort-based analyses

**Table S2.** Partial Spearman correlation coefficients ( $\rho$ ) between effort discounting and responses to the DAS, MDFI and MFIS after controlling for performance. p-values are indicated in parentheses, with asterisks indicating those that survived FDR correction at a threshold of  $\alpha = .05$ .

|                                                  | <u>Effort discounting (<i>k</i>)</u> |
|--------------------------------------------------|--------------------------------------|
| <b><i>Dimensional Apathy Scale</i></b>           |                                      |
| <i>Executive</i>                                 | 0.48 (<.001)*                        |
| <i>Action Initiation</i>                         | 0.12 ( .224)                         |
| <i>Emotional</i>                                 | 0.31 ( .002)*                        |
| <b><i>Multidimensional Fatigue Inventory</i></b> |                                      |
| <i>General</i>                                   | 0.48 (<.001)*                        |
| <i>Physical</i>                                  | 0.28 ( .016)*                        |
| <i>Mental</i>                                    | 0.46 (<.001)*                        |
| <i>Activity</i>                                  | 0.36 ( .002)*                        |
| <i>Motivation</i>                                | 0.43 (<.001)*                        |
| <b><i>Modified Fatigue Impact Scale</i></b>      |                                      |
| <i>Physical</i>                                  | 0.44 (<.001)*                        |
| <i>Cognitive</i>                                 | 0.53 (<.001)*                        |
| <i>Psychosocial</i>                              | 0.50 (<.001)*                        |
